# Supplementary material
Source: publisher figshare collection journal article supplement (https://gsapubs.figshare.com/ndownloader/files/22739456)
Supplement: Supplementary file 1 [file 22739456]

GSA Supple - # 75-21  
mentary Material

11/14/4

Costa 1

SEDIMENT YIELDS FROM PREDOMINANTLY AGRICULTURAL WATERSHEDS

| Stream and location                                         | Drainage area (km <sup>2</sup> )               | Metric tons/km <sup>2</sup> /year sediment yield | Reference                                      |
|-------------------------------------------------------------|------------------------------------------------|--------------------------------------------------|------------------------------------------------|
| Watts Branch<br>Rockville, Md.                              | 9.6                                            | 180.7                                            | Wolman, 1964                                   |
| Seneca Creek<br>Dawsonville, Md.                            | 261.6                                          | 112.1                                            | do.                                            |
| Northwest Branch<br>Anacostia River near<br>Colesville, Md. | 55.2                                           | 164.6                                            | do.                                            |
| Monocacy River<br>Frederick, Md.                            | 2,116.0                                        | 114.5                                            | do.                                            |
| Georges Creek<br>Franklin, Md.                              | 187.5                                          | 72.5                                             | do.                                            |
| Conococheaque Creek<br>Fairview, Md.                        | 1,279.5                                        | 76.0                                             | do.                                            |
| Gunpowder Falls<br>Prettyboy Reservoir<br>Hereford, Md.     | 207.2 (1933-<br>1943)<br>207.3 (1943-<br>1961) | 319.8<br>175.1                                   | Holeman, 1965                                  |
| Gunpowder Falls<br>Lock Raven Dam<br>Towson, Md.            | 777.0 (1914-<br>1943)<br>777.0 (1943-<br>1961) | 283.0<br>81.6                                    | do.                                            |
| East Mahantango Creek<br>Damatia, Pa.                       | 419.6                                          | 80.6                                             | Williams and<br>George, 1968                   |
| Yellow Breeches Creek<br>Camp Hill, Pa.                     | 559.4                                          | 70.1                                             | do.                                            |
| Swatara Creek<br>Harper Tavern, Pa.                         | 872.8                                          | 77.1                                             | do.                                            |
| West Conewago Creek<br>Manchester, Pa.                      | 1,320.9                                        | 70.1                                             | do.                                            |
| Conestoga Creek<br>Lancaster, Pa.                           | 839.2                                          | 70.1                                             | do.                                            |
| Tridelphia Lake<br>Ashton, Md.                              | 207.5                                          | 176.9                                            | do.                                            |
| Lake Issaquenna<br>Clemson, S. C.                           | 36.3 (1939-<br>1941)<br>36.3 (1941-<br>1949)   | 840.6<br>402.9                                   | Gottschalk and<br>Jones, 1955<br>USDA Yearbook |

## SEDIMENT YIELDS FROM PREDOMINANTLY FORESTED WATERSHEDS

| Stream and location                                         | Drainage area (km <sup>2</sup> ) | Metric tons/km <sup>2</sup> /year sediment yield | Percent forested | Reference                  |
|-------------------------------------------------------------|----------------------------------|--------------------------------------------------|------------------|----------------------------|
| Driftwood Branch<br>Sterling Run, Pa.                       | 704.5                            | 17.9                                             | 96               | Williams and George, 1968  |
| Bush Kill<br>Shoemaker, Pa.                                 | --                               | 11.6                                             | 90               | do.                        |
| Abram Creek<br>Oakmont, W. Va.                              | 122.5                            | 7.4                                              | 71               | Wark and Keller, 1963      |
| S. Fork of S. Branch<br>Potomac River<br>Moorefield, W. Va. | 733.0                            | 11.6                                             | 72               | do.                        |
| Cacapon River<br>Great Cacapon, W. Va.                      | 1,753.4                          | 22.4                                             | 73               | do.                        |
| Passage Creek<br>Buckton, Va.                               | 225.3                            | 18.9                                             | 79               | do.                        |
| Penn Creek<br>Penns Creek, Va.                              | 779.6                            | 13.0                                             | 75               | Williams and George, 1968  |
| Juniata River<br>Huntingdon, Pa.                            | 2,113.4                          | 15.4                                             | 71               | do.                        |
| Helton Branch, Ky.                                          | 2.2                              | 5.3                                              | 91               | Collier and others, 1964   |
| Broad Ford, Md.                                             | 19.2                             | 3.9                                              | 100              | Wolman, 1967               |
| Fishing Creek, Md.                                          | 18.9                             | 1.8                                              | 100              | do.                        |
| Pond Branch<br>Baisman Run, Md.                             | .39                              | 1.1                                              | 100              | Cleaves and others, 1970   |
| Walnut Cove near<br>Walnut Cove, N. C.                      | 1,004.9                          | 9.2                                              | 65               | Task Committee, ASCE, 1970 |

FLOODING RECURRENCE INTERVALS FOR MOST EXTENSIVE  
ALLUVIAL FLAT BORDERING PIEDMONT STREAMS (LESS THAN 26 KM<sup>2</sup>)

| Stream                                                       | Drainage area<br>(km <sup>2</sup> ) | Recurrence<br>interval<br>(years) | Reference                      |
|--------------------------------------------------------------|-------------------------------------|-----------------------------------|--------------------------------|
| Shetley Creek near<br>Norcross, Ga.                          | 2.54                                | 5.2                               | Kilpatrick and<br>Barnes, 1964 |
| McClelland Creek near<br>Statesville, N. C.                  | 4.14                                | 7.5                               | do.                            |
| Slade Run near<br>Glyndon, Md.                               | 5.41                                | 3.3                               | Costa, this report             |
| Pew Creek near<br>Lawrenceville, Ga.                         | 5.78                                | 2.0                               | Kilpatrick and<br>Barnes, 1964 |
| Carroll Creek near<br>Colletsville, N. C.                    | 7.15                                | 10.0                              | do.                            |
| Long Creek near<br>Kittrell, N. C.                           | 8.44                                | 1.8                               | do.                            |
| Watts Branch, Md.                                            | 11.14                               | 2.2                               | Leopold and<br>others, 1964    |
| Gwynns Falls at<br>Owings Mills, Md.                         | 12.69                               | 5.0                               | Costa, this report             |
| Dial Creek near<br>Bahama, N. C.                             | 12.69                               | 5.3                               | Kilpatrick and<br>Barnes, 1964 |
| Sofkahatchee Creek<br>near Wetumpka, Ala.                    | 13.21                               | 2.9                               | do.                            |
| $\bar{X}_1 = 4.5 \text{ years}$<br>$S_1 = 2.5 \text{ years}$ |                                     |                                   |                                |

FLOODING RECURRENCE INTERVALS FOR MOST EXTENSIVE  
ALLUVIAL FLAT BORDERING PIEDMONT STREAMS (MORE THAN 26 KM<sup>2</sup>)

| Stream                                         | Drainage area<br>(km <sup>2</sup> ) | Recurrence<br>interval<br>(years) | Reference                      |
|------------------------------------------------|-------------------------------------|-----------------------------------|--------------------------------|
| Big Knob Creek near<br>Fallston, N. C.         | 42.2                                | 2.2                               | Kilpatrick and<br>Barnes, 1964 |
| Forebrush Creek near<br>Yadkinville, N. C.     | 56.2                                | 2.9                               | do.                            |
| Murder Creek near<br>Monticello, Ga.           | 62.2                                | 1.55                              | do.                            |
| Yellow River near<br>Lawrenceville, Ga.        | 68.6                                | 1.05                              | do.                            |
| Yadkin River at<br>Patterson, N. C.            | 74.6                                | 13.7                              | do.                            |
| Moon Creek near<br>Yancyville, N. C.           | 77.4                                | 1.01                              | do.                            |
| Gwynns Falls at<br>Villa Nova, Md.             | 84.2                                | 2.3                               | Costa, this report             |
| South Beaverdam Creek<br>near Dewy Rose, Ga.   | 92.7                                | 2.33                              | Kilpatrick and<br>Barnes, 1964 |
| Little Gunpowder Falls<br>at Laurel Brook, Md. | 93.5                                | 2.79                              | Costa, this report             |
| Western Run at<br>Western Run, Md.             | 154.9                               | 2.0                               | do.                            |
| Eno River at<br>Hillsboro, N. C.               | 172.2                               | 1.1                               | Kilpatrick and<br>Barnes, 1964 |
| Cove Creek near<br>Lake Lure, N. C.            | 199.4                               | 4.8                               | do.                            |
| Henry Fork near<br>Henry River, N. C.          | 207.2                               | 4.5                               | do.                            |
| Reddies River near<br>North Wilkesboro, N. C.  | 243.2                               | 2.5                               | do.                            |

|                                              |         |      |                                |
|----------------------------------------------|---------|------|--------------------------------|
| Talladega Creek near<br>Talledega, Ala.      | 254.9   | 1.82 | Kilpatrick and<br>Barnes, 1964 |
| Etowah River near<br>Dawsonville, Ga.        | 266.8   | 2.33 | do.                            |
| South Tyger River near<br>Reidville, S. C.   | 274.5   | 6.5  | do.                            |
| Yellow River near<br>Snellville, Ga.         | 327.6   | 1.71 | do.                            |
| Yellow River near<br>Snellville, Ga.         | 347.1   | 3.5  | do.                            |
| Chattahoochee River<br>near Leaf, Ga.        | 388.5   | 2.6  | do.                            |
| Haw River near<br>Beneja, N. C.              | 435.1   | 1.32 | do.                            |
| Tobesofkee Creek<br>near Macon, Ga.          | 471.4   | 2.65 | do.                            |
| Hillabee Creek near<br>Hackneyville, Ala.    | 507.6   | 1.65 | do.                            |
| Second Broad River<br>at Cliffside, N. C.    | 546.5   | 6.0  | do.                            |
| Little River near<br>Mt. Carmel, S. C.       | 562.0   | 1.19 | do.                            |
| Deep River at<br>Ramseur, N. C.              | 880.6   | 1.15 | do.                            |
| Uwharrie River near<br>Eldorado, N. C.       | 898.7   | 2.6  | do.                            |
| Middle Oconee River<br>near Athens, Ga.      | 1,030.8 | 3.0  | do.                            |
| Stevens Creek near<br>Modoc, S. C.           | 1,411.6 | 1.16 | do.                            |
| South Fork Catawba River<br>at Lowell, N. C. | 1,631.7 | 4.0  | do.                            |

---


$$\bar{X}_2 = 2.9 \text{ years}$$

$$S_2 = 2.4 \text{ years}$$

$$\alpha = 0.05, t = 2.021; t = 2.38, \text{ reject } \bar{X}_1 = \bar{X}_2$$


---
